# Supplementary material for: Nighttime Blood Pressure Phenotype and Cardiovascular Prognosis: Practitioner-Based Nationwide JAMP Study
Source: PubMed Central journal article supplement — Circulation. 2020 Nov 2;142(19):1810–20. doi: 10.1161/CIRCULATIONAHA.120.049730 (PMC7643792; doi:10.1161/circulationaha.120.049730), 2020-11-02
Supplement: cir-142-1810-s001.pdf [file cir-142-1810-s001.pdf]

## **SUPPLEMENTAL MATERIAL**

### **Nighttime Blood Pressure Phenotype And Cardiovascular Prognosis: The Practitioner-Based JAMP Study**

Kazuomi Kario, Satoshi Hoshide, Hiroyuki Mizuno, Tomoyuki Kabutoya, Masafumi Nishizawa, Tetsuro Yoshida, Hideyasu Abe, Tomohiro Katsuya, Yumiko Fujita, Osamu Okazaki, Yuichiro Yano, Naoko Tomitani, Hiroshi Kanegae, on behalf of JAMP study group

#### **TABLE OF CONTENTS**

|                                                      |    |
|------------------------------------------------------|----|
| <b>SUPPLEMENTAL METHODS</b> .....                    | 5  |
| <b>Study design</b> .....                            | 5  |
| <b>Study inclusion and exclusion criteria</b> .....  | 6  |
| <b>Data processing</b> .....                         | 7  |
| <b>Outcome determination</b> .....                   | 7  |
| <b>SUPPLEMENTAL FIGURES AND FIGURE LEGENDS</b> ..... | 9  |
| <b>Supplemental Figure I.</b> .....                  | 9  |
| <b>Supplemental Figure II.</b> .....                 | 10 |
| <b>SUPPLEMENTAL TABLES</b> .....                     | 13 |
| <b>Supplemental Table I.</b> .....                   | 13 |
| <b>Supplemental Table II.</b> .....                  | 14 |
| <b>Supplemental Table III.</b> .....                 | 16 |

## **JAMP STUDY GROUP**

### **Steering Committee:**

Kazuomi Kario (Principal Investigator, Jichi Medical University), Satoshi Hoshide, Hiroyuki Mizuno, Tomoyuki Kabutoya, Masafumi Nishizawa

### **Study Office:**

Satoshi Hoshide (Study Manager), Noriko Harada, Yuri Matsumoto, Hiroshi Kanegae (Statistician), Naoko Tomitani (Statistician).

### **Investigators network** (130 investigators [116 institutions]):

**Hokkaido:** Kenji Aoki, Ebetsu City Hospital; Hajime Kihara, Kihara Junkankika Naika Iin; Toshiro Koga, Koga Hospital; Tomoaki Nakata, Hakodate Goryokaku Hospital; Kenji Oku, Kushiro Red Cross Hospital. **Aomori:** Yasufumi Matsuoka, Oma Hospital. Iwate: Hiroaki Omori, Shizukuishi Omori Clinic. **Miyagi:** Masafumi Nishizawa, Minamisanriku Hospital; Yasuo Tanno, Tozai Clinic Sendai. **Yamagata:** Yoko Fukase, Tokamachi Yoko-Clinic; Koki Omi, Nihonkai Hospital; Jun Takahashi, Asahi Town Clinic. **Fukushima:** Hiroyuki Mizuno, Miyashita Hospital, Kaneyama Clinic and Minami Aizu Hospital; Michiya Saito, Michiya Clinic; Junichi Yatabe, Takada Kosei Hospital. **Ibaraki:** Kazuo Eguchi, Koga Red Cross Hospital; Kiyoshi Iwashita, Sowa Chuo Hospital; Maki Kumada, Chikusei City Hospital; Gaku Oki, Yuki Hospital. **Tochigi:** Kazuomi Kario, Satoshi Hoshide, Tomoyuki Kabutoya, Kazuo Eguchi, Yukihiro Hojo, Masaru Ichida, Shizukiyo Ishikawa, Takahiro Komori, Yoshio Matsui, Masatoshi Matsumoto, Shoichiro Nagasaka, Masahiro Nakano, Yoshioki Nishimura, Kenta Okada, Kazuyuki Shimada, Masahisa Shimpō, Nozomu Takahashi and Hideyuki Uno, Jichi Medical University School of Medicine; Kazuomi Kario, Joji Ishikawa and Shizukiyo Ishikawa, Washiya Hospital; Kazuo Eguchi, International University of Health and Welfare;

Tomoyuki Kabutoya, Tochigi-Medical Center Shimotsuga; Takahiro Komori, Shin-Oyama City Hospital and Oyama City Hospital; Toshio Kuroda, Kurodanaika-Junkankika. **Gunma:** Nobutsune Hirahara, Hirahara clinic; Yuta Kemi, Uenomura clinic. **Saitama:** Hisashi Yoshioka, Yoshioka Naika Kodomo Clinic. **Tokyo:** Sakuo Hoshi, Yurin hospital; Atsuhiko Mizuno, St. Luke's international hospital; Kunihiko Ohno, Ohno iin; Osamu Okazaki, National Center for Global Health and Medicine; Tsunehiro Saito, Good sleep clinic; Tetsu Tanaka, Mitsui memorial hospital; Kazuo Yamashiro, Juntendo university hospital; Tatsuyuki Yamauchi, Murayama clinic; Shisei Yo, Azuma Iin; Shigeru Yomogita, Jindai Clinic.

**Kanagawa:** Sayaka Hikita, Fujino Clinic and Chigira Clinic; Sakuo Hoshi, Minami Yamato Hospital. **Niigata:** Yasuhiro Kawase, Kawase neurology clinic; Yoshifumi Nojiri, Joetsu community medical center. **Toyama:** Yukihiro Sato, Kamiichi general hospital. **Nagano:** Kiyoshi Uchiba, Ohoka Clinic. **Gifu:** Motoyuki Ishiguro, Ishiguro Clinic. **Shizuoka:** Atsushi Taguchi, Taguchi Naika Junkankika Iin. **Aichi:** Kazumasa Iida, Iida Iin; Tatsuya Takemoto, Takemoto Clinic. **Mie:** Katsuyuki Tone, Momotori Clinic. **Hyogo:** Hideyasu Abe and Yasuhisa Abe, Abe Internal Medicine Clinic; Masami Hasegawa, Hasegawa Iin; Tomohiro Katsuya, Katsuya Clinic; Yoshiharu Okada, Okada Clinic; Shinichiro Tanaka, Toyooka hospital, Hidaka Medical Center; Genyo Tanke, Ishindo Tanke Naika clinic. **Nara:** Takeshi Takami, Clinic Jingumae. **Wakayama:** Jun Michiura, Michiura Clinic; Masahiko Shiotani, Shiotani Clinic. **Tottori:** Tomohiro Aoki, Kitaoka Hospital. **Okayama:** Koichi Ogura, Mizushima Kyodo Hospital. **Hiroshima:** Yuzuru Kawamura, Kawamura Clinic; Shigekiyo Nakanishi, Nakanishi Naika; Nobuo Sasaki, Mitsubishi Mihara Hospital; Toshiyuki Takahashi, Takahashi Clinic. **Yamaguchi:** Akihisa Fujii, Mitsuyama Clinic; Eiichiro Tanaka and Hiroyuki Katayama, Hagi-shi Susa Shinryo Center; Yoshio Matsui, Iwakuni Medical Center; Yoshio Matsui, Hikari Chuo Hospital; Motoki Fukutomi and Kosuke Miyoshi, Heigun Clinic; Hiroaki Naito and Sawa Yokota, Hongo Clinic; Kazumasa Nakamura and

Tetsu Yokota, Miwa Hospital. **Tokushima:** Shinsuke Takasugi, Takasugi Hospital. **Kagawa:** Shuichiro Fujita, Fuji Clinic; Yumiko Fujita, Fujita Neurosurgery Clinic. **Ehime:** Hitoshi Kaneko, Kaneko Junkankika Naika Clinic. **Kochi:** Takeshi Fujiwara, Otsuki hospital; Wataru Kitamura, Kitamura Ladies Clinic. **Fukuoka:** Yuhei Anan, Ainoshima Clinic; Tomohiro Deguchi and Yuki Imaizumi, Iizuka City Hospital; Jun Miyagi, Miyagi Clinic; Yuki Imaizumi and Takahiro Tsuji, Ohshima Clinic; Yasuhiro Uchiwa, Uchiwa Internal Medicine Clinic; Shin Ueda, Ueda Internal Clinic; Takeya Yamaguchi and Yuki Imaizumi, Kotake Town Hospital ; Tetsuro Yoshida, Onga Nakama Medical Association ONGA Hospital; Ryo Yoshinaga, Iizuka Hospital. **Saga:** Keisuke Narita, Madarashima Clinic. **Kumamoto:** Kosuke Maeda and Kotaro Kunitomo, Yushima clinic; Kyousei Soda, Soda In. **Oita:** Hirotohi Baba, Tsukinoki Clinic; Keisuke Yonezu and Akihiro Hino, Yamaga Hospital; Genta Miura, Himejima Clinic; Tomoko Nakamura, Saganoseki Clinic. **Miyazaki:** Munetoshi Kuroki, Kuroki Naika In; Fumihiko Omori, Omori Medical Clinic; Toshiaki Hidaka, Kitaura Clinic; Takanori Hidaka, Kitakata In; Yuichiro Yano and Yoshimasa Kanemaru, Saigo Clinic; Michitaka Kitani, Kitani In; Masahiro Koga, Koga Naika Icho-Ka; Hirohide Kubo, Imakiire Clinic; Masachika Kuwabara, Kuwabara In; Junichi Miyata, Miyata Naika In; Masahiko Nagata, Kijo Clinic; Koji Sasaki, Sasaki In; Noboru Tamaki, Tamaki Clinic; Hiroyasu Tasaka, Clinic Kaya; Naoto Yokota, Yokota Naika; Yuichiro Yano and Dofuku, Nango Clinic. **Kagoshima:** Takahiro Miyata, Ikeda Clinic. **Okinawa:** Eiyu Katsuren, Katsuren Medical Clinic; Norifumi Kudaken, Kubagawa Medical Clinic; Noriharu Yagi, Yaginaika In.

## **SUPPLEMENTAL METHODS**

### **Study design**

The JAMP (Japan Ambulatory Blood Pressure Monitoring Prospective) study was designed to investigate the prognostic impact of ambulatory blood pressure monitoring (ABPM) parameters in general practice. Participants were recruited by general practitioners from 36 prefectures around Japan if they fulfilled the inclusion and exclusion criteria.

ABPM recordings were performed at baseline, and patient demographic and clinical data were collected (including age, sex, body mass index, smoking status, habitual drinking, prevalence of hypertension, diabetes and dyslipidemia, pre-existing coronary artery disease, heart failure or stroke, and use of antihypertensive medication. Patient history data were obtained from medical records.

The next phase was patient follow-up. This was an observational study, and therefore there were no specific recommendations with respect to management of patients, including frequency of visits, type of drug treatment or blood pressure (BP) goal, and no data on BP level or antihypertensive drug use were recorded during follow-up. Practitioners were instructed to carefully report and document all outcome events that occurred during the follow-up and were asked each year about the morbidity and mortality status of the patients. If there was no response to the initial query, practitioners (and then patients) were telephoned by a study physician.

In Japan, there are 47 administrative divisions (prefectures). In 36 of the prefectures, 130 doctors at 116 institutions (72 primary practices, 40 hospital-based outpatient clinics, and 3 specialized university hospitals) agreed with the aims of this study and collected baseline and prospective data from individuals who agreed to participate in this project.

## Study inclusion and exclusion criteria

---

### **Inclusion criteria:**

Patients with at least one of the following cardiovascular risk factors:

- a. Diabetes or glucose tolerance disorder (receiving antidiabetic treatment, or fasting blood sugar  $\geq 110$  mg/dL, or  $\geq 140$  mg/dL in a 2-hour 75g oral glucose tolerance test)
- b. Dyslipidemia (receiving lipid-lowering therapy, or total cholesterol  $> 240$  mg/dL)
- c. Hypertension (receiving antihypertensive therapy, or office BP  $\geq 140/90$  mmHg or home BP  $\geq 135/85$  mmHg)
- d. Current smoker
- e. Renal disease (positive proteinuria or serum creatinine  $\geq 1.1$  mg/dL)
- f. Atrial fibrillation
- g. Metabolic syndrome
- h. Chronic obstructive pulmonary disease
- i. Sleep apnea syndrome

---

### **Exclusion criteria:**

Patients with at least one of the following criteria:

- a. Ischemic heart disease, cerebrovascular disease (except for asymptomatic or transient ischemic attack), aortic dissection, chronic arterial obstruction or history of heart failure requiring hospitalization within 6 months
  - b. Requiring hemodialysis
  - c. Any other severe diseases (e.g. cancer, connective tissue disease)
  - d. Inability to provide informed consent (e.g. age  $< 20$  years, cognitive dysfunction)
  - e. Unable to walk unaided (use of cane permitted)
-

## **Data processing**

Each individual used a diary to record information about the times of falling asleep and waking up. After wearing the ABPM device for  $\geq 24$  hours, participants returned to the clinic where ABPM data were downloaded from the device and electronic data files were sent to the study control center. Data management and statistical analysis were conducted in an independent facility (Jichi Medical University Center of Global Home and Ambulatory BP Analysis [GAP], Jichi Medical University Center of Excellence Community Medicine Cardiovascular Research and Development [JCARD], Shimotsuke, Japan).

## **Outcome determination**

Annual follow-up visits were conducted to determine vital status and the incidence of fatal and nonfatal cardiovascular events. If no clinic follow-up visit was planned, investigators or study secretariat telephoned or sent letters to patients to get the required information.

Cardiovascular disease events were included as follows:

- Atherosclerotic cardiovascular disease (including coronary artery disease and stroke, as defined below)
- Coronary artery disease: acute myocardial infarction, angina pectoris requiring percutaneous coronary intervention, and sudden death within 24 hours of the abrupt onset of symptoms (criteria for myocardial infarction included definite electrocardiographic findings [i.e. ST elevation], typical or atypical symptoms and electrocardiographic findings and abnormal enzymes, or typical symptoms and abnormal cardiac enzymes with or without electrocardiographic findings)
- Stroke (including cerebral infarction, cerebral hemorrhage, and subarachnoid hemorrhage): sudden onset of neurological deficit persisting for at least 24 hours in the absence of any other disease that could account for the symptoms based on the findings

of brain computed tomography, magnetic resonance imaging or autopsy (transient ischemic attacks, in which the neurological deficit was completely resolved within 24-hr of the onset of symptoms, were not counted as stroke events)

- Heart failure: an event requiring hospital admission due to clinical manifestations of heart failure such as the presence of dyspnea, systemic edema or edema in lower limbs, third heart sound, pulmonary congestion or cardiac dilation on chest X-ray, reduced systolic/diastolic function on echocardiography, and requirement for treatment



## SUPPLEMENTAL FIGURES AND FIGURE LEGENDS

**Supplemental Figure I.** Flow chart of study participants

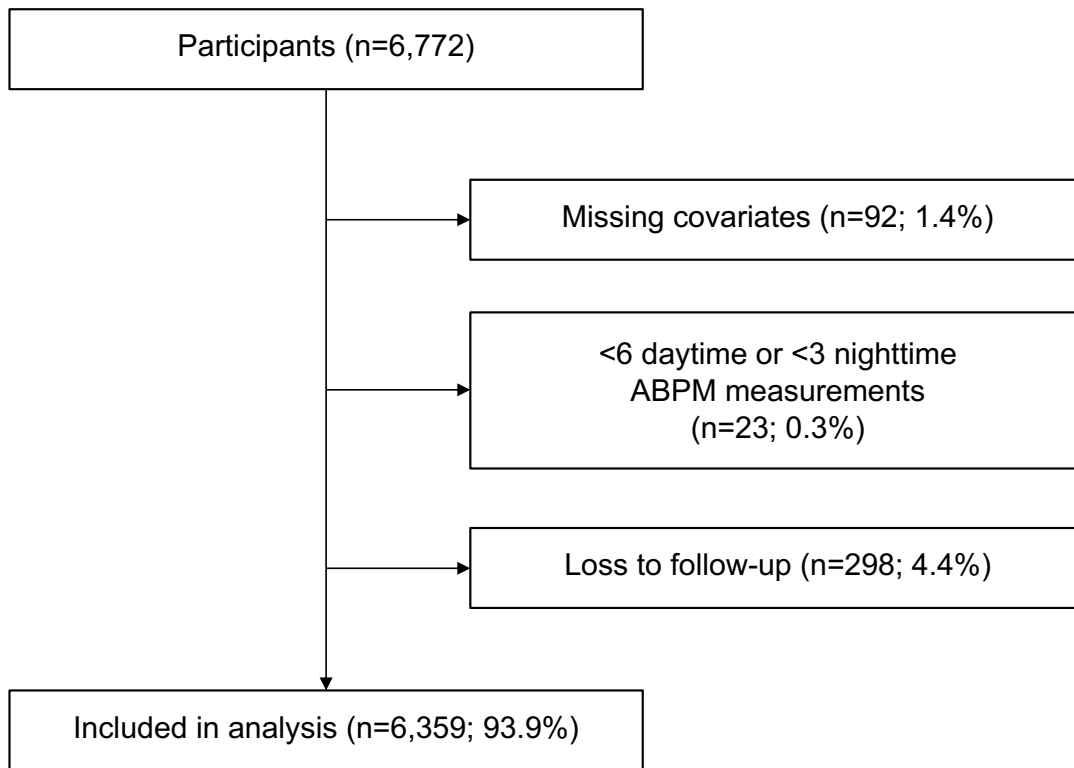

**Supplemental Figure II.** Cumulative incidence of different cardiovascular disease events by dipping status (adjusted for age, sex, body mass index, smoking, alcohol use, diabetes, dyslipidemia, history of cardiovascular disease, use of antihypertensive drugs, bedtime dosing, office systolic blood pressure, and nighttime systolic blood pressure).

ASCVD, atherosclerotic cardiovascular disease; CAD, coronary artery disease; CVD, cardiovascular disease.

### CVD

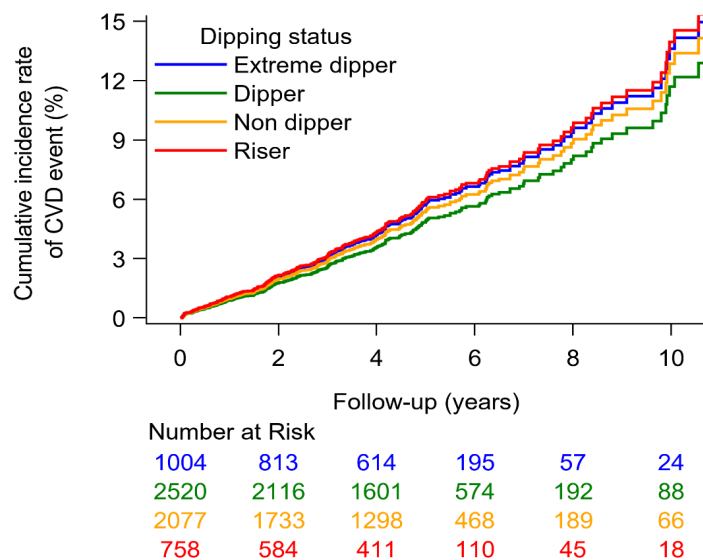

### ASCVD

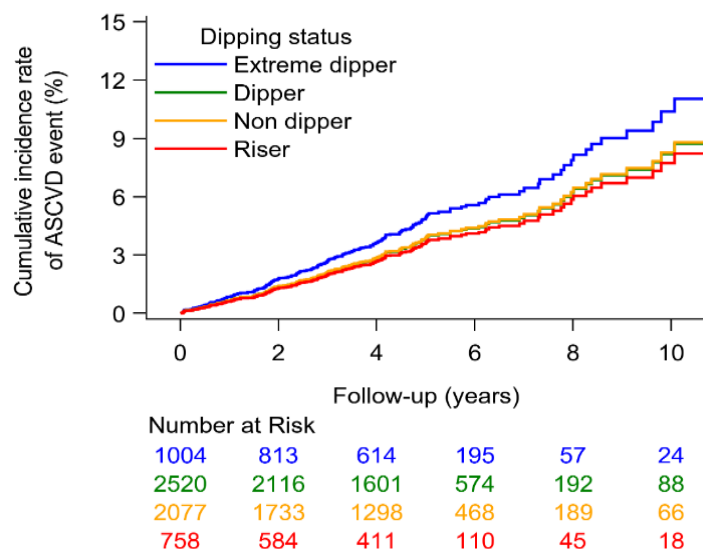

## Stroke

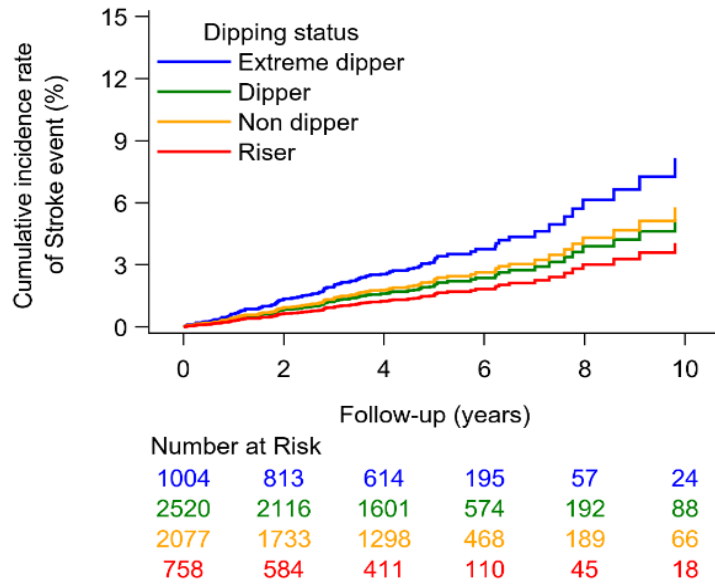

## CAD

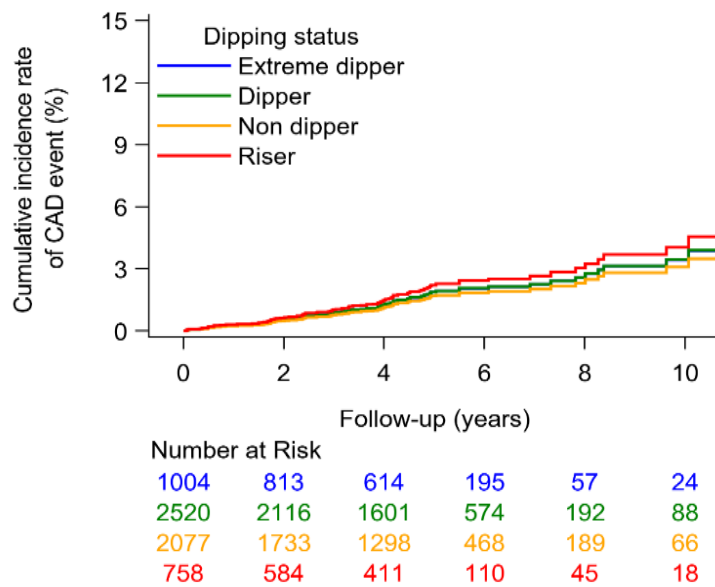

## Heart failure

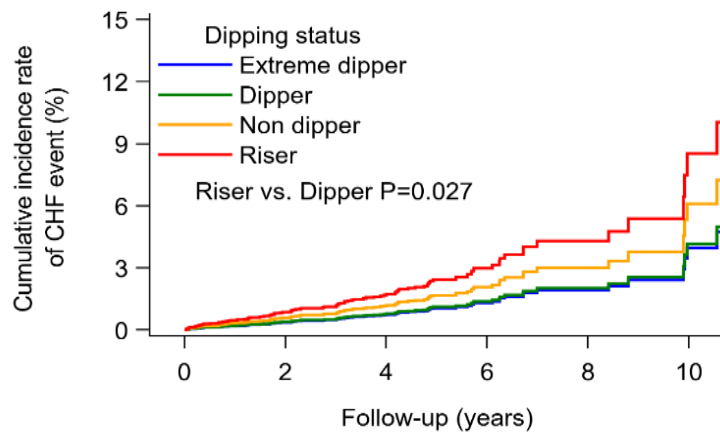

Number at Risk

1004

813

614

195

57

24

2520

2116

1601

574

192

88

2077

1733

1298

468

189

66

758

584

411

110

45

18

**SUPPLEMENTAL TABLES**

**Supplemental Table I.** Incidence of cardiovascular disease events by dipping status of nighttime systolic blood pressure

|                | n     | Total CVD<br>(ASCVD + HF) |                             | ASCVD                |                             |        |                             |        |                             | HF     |                             |
|----------------|-------|---------------------------|-----------------------------|----------------------|-----------------------------|--------|-----------------------------|--------|-----------------------------|--------|-----------------------------|
|                |       |                           |                             | ASCVD (Stroke + CAD) |                             | Stroke |                             | CAD    |                             |        |                             |
|                |       | Events                    | Per 1000 pt-yrs<br>(95% CI) | Events               | Per 1000 pt-yrs<br>(95% CI) | Events | Per 1000 pt-yrs<br>(95% CI) | Events | Per 1000 pt-yrs<br>(95% CI) | Events | Per 1000 pt-yrs<br>(95% CI) |
| Extreme dipper | 1,004 | 38                        | 8.7<br>(6.3–11.9)           | 31                   | 7.1<br>(5.0–10.0)           | 19     | 4.3<br>(2.8–6.8)            | 12     | 2.7<br>(1.6–4.8)            | 7      | 1.6<br>(0.8, –3.3)          |
| Dipper         | 2,520 | 97                        | 8.4<br>(6.9–10.2)           | 75                   | 6.5<br>(5.2–8.1)            | 38     | 3.3<br>(2.4–4.5)            | 37     | 3.2<br>(2.3–4.4)            | 22     | 1.9<br>(1.3–2.9)            |
| Non dipper     | 2,077 | 114                       | 11.9<br>(10.0–14.3)         | 79                   | 8.3<br>(6.6–10.3)           | 46     | 4.8<br>(3.6–6.4)            | 33     | 3.5<br>(2.5–4.9)            | 35     | 3.7<br>(2.6–5.1)            |
| Riser          | 758   | 57                        | 18.4<br>(14.2–23.8)         | 33                   | 10.7<br>(7.6–14.9)          | 16     | 5.2<br>(3.2–8.4)            | 17     | 5.5<br>(3.4–8.8)            | 24     | 7.8<br>(5.2–11.5)           |

ASCVD, atherosclerotic cardiovascular disease; CAD, coronary artery disease; CI, confidence interval; CVD, cardiovascular disease; HF, heart failure; pt, patient;; yrs, years.

**Supplemental Table II.** Improvements in model performance (net reclassification improvement)

|                                                  | <b>Total CVD</b>         |                | <b>ASCVD</b>                |                |                          |                | <b>HF</b>                 |                |                          |                |
|--------------------------------------------------|--------------------------|----------------|-----------------------------|----------------|--------------------------|----------------|---------------------------|----------------|--------------------------|----------------|
|                                                  | <b>(ASCVD + HF)</b>      |                | <b>ASCVD (Stroke + CAD)</b> |                | <b>Stroke</b>            |                | <b>CAD</b>                |                | <b>NRI (95% CI)</b>      | <b>p-value</b> |
|                                                  | <b>NRI (95% CI)</b>      | <b>p-value</b> | <b>NRI (95% CI)</b>         | <b>p-value</b> | <b>NRI (95% CI)</b>      | <b>p-value</b> | <b>NRI (95% CI)</b>       | <b>p-value</b> |                          |                |
| Base model                                       | –                        | –              | –                           | –              | –                        | –              | –                         | –              | –                        | –              |
| Base model +<br>24-hour SBP*                     | 0.154<br>(0.048, 0.277)  | 0.018          | 0.178<br>(0.046, 0.312)     | 0.012          | 0.163<br>(–0.039, 0.306) | 0.088          | 0.192<br>(–0.019, 0.378)  | 0.071          | 0.131<br>(–0.091, 0.397) | 0.312          |
| Base model +<br>daytime SBP*                     | 0.080<br>(–0.048, 0.210) | 0.250          | 0.075<br>(–0.077, 0.220)    | 0.330          | 0.177<br>(–0.024, 0.348) | 0.067          | –0.039<br>(–0.263, 0.175) | 0.721          | 0.049<br>(–0.169, 0.359) | 0.724          |
| Base model +<br>nighttime SBP*                   | 0.150<br>(0.026, 0.275)  | 0.011          | 0.134<br>(–0.000, 0.271)    | 0.054          | 0.170<br>(–0.034, 0.318) | 0.077          | 0.117<br>(–0.089, 0.359)  | 0.243          | 0.199<br>(–0.006, 0.443) | 0.093          |
| Base model +<br>dipping status*                  | 0.200<br>(0.059, 0.324)  | 0.003          | 0.153<br>(–0.021, 0.276)    | 0.056          | 0.170<br>(–0.068, 0.353) | 0.089          | 0.162<br>(–0.042, 0.357)  | 0.098          | 0.413<br>(0.180, 0.625)  | <0.001         |
| Base model +<br>24-hour SBP +<br>dipping status† | 0.111<br>(–0.062, 0.229) | 0.107          | 0.164<br>(–0.012, 0.284)    | 0.042          | 0.170<br>(–0.068, 0.353) | 0.089          | 0.043<br>(–0.150, 0.190)  | 0.642          | 0.293<br>(0.082, 0.553)  | 0.013          |
| Base model +<br>daytime SBP +<br>dipping status† | 0.200<br>(0.022, 0.293)  | 0.006          | 0.082<br>(–0.137, 0.209)    | 0.335          | 0.170<br>(–0.069, 0.352) | 0.090          | 0.104<br>(–0.061, 0.279)  | 0.266          | 0.342<br>(0.096, 0.585)  | 0.004          |

|                             |                 |       |                |       |                |       |                 |       |                 |       |
|-----------------------------|-----------------|-------|----------------|-------|----------------|-------|-----------------|-------|-----------------|-------|
| Base model +                |                 |       |                |       |                |       |                 |       |                 |       |
| nighttime SBP +             | 0.072           |       | 0.212          |       | 0.271          |       | -0.001          |       | 0.202           |       |
| dipping status <sup>†</sup> | (-0.067, 0.244) | 0.358 | (0.064, 0.339) | 0.004 | (0.083, 0.505) | 0.023 | (-0.190, 0.176) | 0.995 | (-0.025, 0.470) | 0.098 |

---

Base model includes age, sex, body mass index, smoking, alcohol use, diabetes, dyslipidemia, history of cardiovascular disease, use of antihypertensive drugs, nighttime prescription, and office systolic blood pressure.

\*p-values are differences of base model vs. base model + 24-hour SBP or + daytime SBP or + nighttime SBP or +dipping status.

<sup>†</sup>p-values are differences of base model + ABPM indices vs. base model + ABPM indices + dipping status.

ASCVD, atherosclerotic cardiovascular disease; CAD, coronary artery disease; CI, confidence interval; CVD, cardiovascular disease; HF, heart failure; NRI, net reclassification improvement; SBP, systolic blood pressure.

**Supplemental Table III.** Improvements in model performance (integrated discrimination improvement)

|                                                              | Total CVD                  |         | ASCVD                      |         |                             |         | HF                         |              |                             |       |
|--------------------------------------------------------------|----------------------------|---------|----------------------------|---------|-----------------------------|---------|----------------------------|--------------|-----------------------------|-------|
|                                                              | (ASCVD + HF)               |         | ASCVD (Stroke + CAD)       |         | Stroke                      | CAD     |                            | IDI (95% CI) | p-value                     |       |
|                                                              | IDI (95% CI)               | p-value | IDI (95% CI)               | p-value | IDI (95% CI)                | p-value | IDI (95% CI)               |              |                             |       |
| Base model                                                   | –                          | –       | –                          | –       | –                           | –       | –                          | –            | –                           |       |
| Base model +<br>24-hour SBP*                                 | 0.0033<br>(0.0017, 0.0052) | <0.001  | 0.0024<br>(0.0015, 0.0033) | <0.001  | 0.0017<br>(0.0012, 0.0028)  | <0.001  | 0.0011<br>(0.0004, 0.0019) | 0.003        | 0.0014<br>(–0.0005, 0.0037) | 0.123 |
| Base model +<br>daytime SBP*                                 | 0.0015<br>(0.0004, 0.0024) | 0.003   | 0.0016<br>(0.0009, 0.0023) | <0.001  | 0.0014<br>(0.0010, 0.0022)  | <0.001  | 0.0006<br>(0.0001, 0.0011) | 0.029        | 0.0000<br>(–0.0001, 0.0001) | 0.759 |
| Base model +<br>nighttime SBP*                               | 0.0053<br>(0.0030, 0.0075) | <0.001  | 0.0025<br>(0.0016, 0.0035) | <0.001  | 0.0013<br>(0.0007, 0.0020)  | <0.001  | 0.0020<br>(0.0010, 0.0029) | <0.001       | 0.0062<br>(0.0013, 0.0125)  | 0.014 |
| Base model +<br>dipping status*                              | 0.0030<br>(0.0015, 0.0046) | <0.001  | 0.0006<br>(0.0002, 0.0009) | 0.001   | 0.0003<br>(0.0000, 0.0006)  | 0.020   | 0.0014<br>(0.0006, 0.0022) | 0.002        | 0.0087<br>(0.0038, 0.0146)  | 0.004 |
| Base model +<br>24-hour SBP +<br>dipping status <sup>†</sup> | 0.0021<br>(0.0008, 0.0034) | 0.002   | 0.0003<br>(0.0000, 0.0006) | 0.030   | 0.0003<br>(–0.0011, 0.0007) | 0.181   | 0.0011<br>(0.0005, 0.0019) | 0.002        | 0.0078<br>(0.0030, 0.0135)  | 0.004 |
| Base model +<br>daytime SBP +<br>dipping status <sup>†</sup> | 0.0035<br>(0.0015, 0.0054) | <0.001  | 0.0008<br>(0.0002, 0.0013) | <0.001  | 0.0003<br>(–0.0000, 0.0007) | 0.043   | 0.0016<br>(0.0007, 0.0024) | <0.001       | 0.0091<br>(0.0039, 0.0146)  | 0.004 |



|                             |                   |       |                  |       |                  |       |                  |       |                  |       |
|-----------------------------|-------------------|-------|------------------|-------|------------------|-------|------------------|-------|------------------|-------|
| Base model +                |                   |       |                  |       |                  |       |                  |       |                  |       |
| nighttime SBP +             | 0.0005            |       | 0.0004           |       | 0.0008           |       | 0.0005           |       | 0.0032           |       |
| dipping status <sup>†</sup> | (-0.0000, 0.0010) | 0.109 | (0.0002, 0.0007) | 0.004 | (0.0004, 0.0014) | 0.001 | (0.0000, 0.0010) | 0.067 | (0.0005, 0.0080) | 0.065 |

---

Base model includes age, sex, body mass index, smoking, alcohol use, diabetes, dyslipidemia, history of cardiovascular disease, use of antihypertensive drugs, nighttime prescription, and office systolic blood pressure.

\*p-values are differences of base model vs. base model + 24-hour SBP or + daytime SBP or + nighttime SBP or +dipping status.

<sup>†</sup>p-values are differences of base model + ABPM indices vs. base model + ABPM indices + dipping status.

ASCVD, atherosclerotic cardiovascular disease; CAD, coronary artery disease; CI, confidence interval; CVD, cardiovascular disease; HF, heart failure; IDI, integrated discrimination improvement; SBP, systolic blood pressure.
